# Supplementary material for: Pre-treatment thrombocytosis predicts prognosis of endometrial cancer: A meta-analysis of 11 studies
Source: PubMed Central journal article supplement — Exp Ther Med. 2019 Nov 18;19(1):359–66. doi: 10.3892/etm.2019.8205 (PMC6909484; doi:10.3892/etm.2019.8205), 2019-11-18

Figure S1. Forest plot of studies evaluating the association between pre-treatment thrombocytosis and progression-free survival for endometrial cancer. HR, hazard ratio.

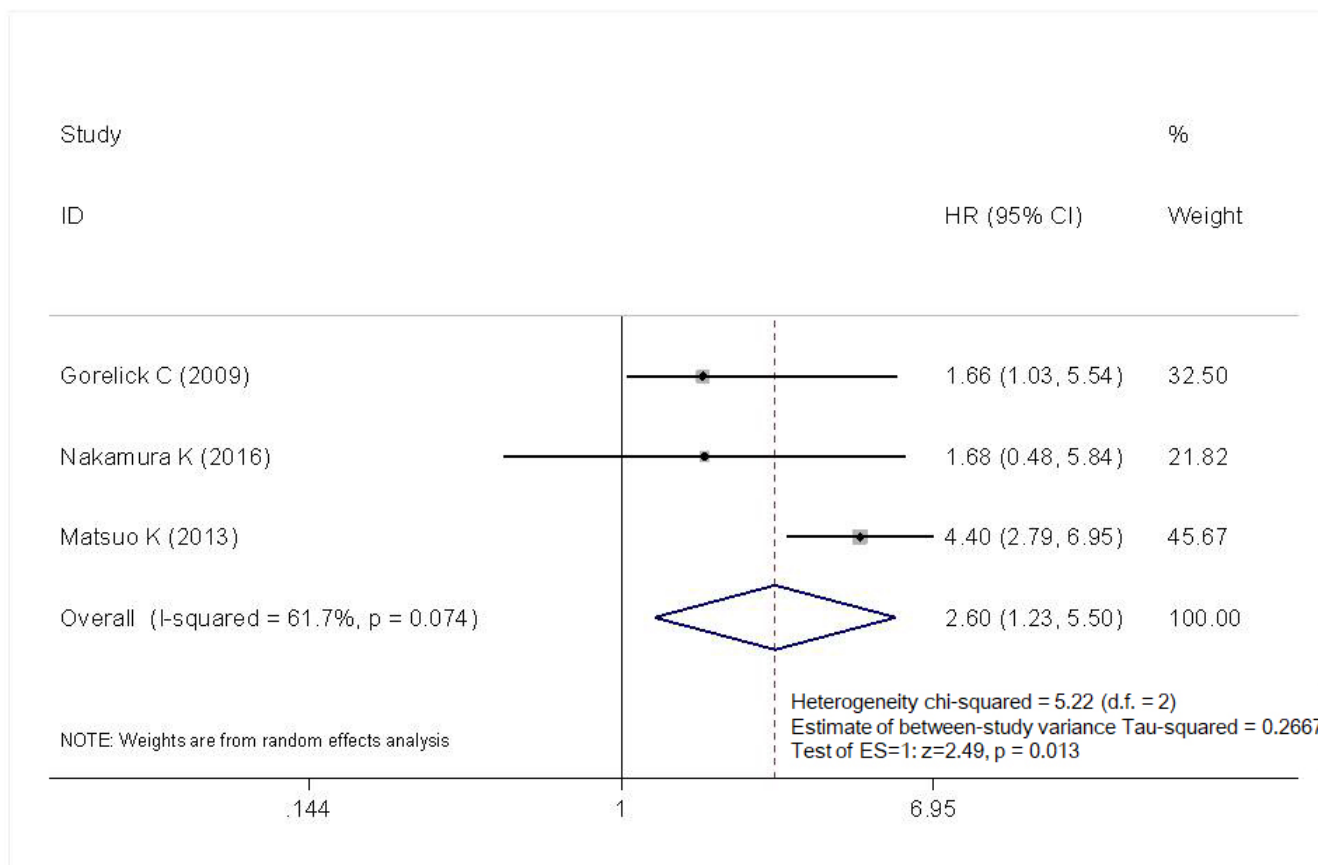

Figure S2. Forest plot of studies evaluating the association between pre-treatment thrombocytosis and disease-free survival for endometrial cancer. HR, hazard ratio.

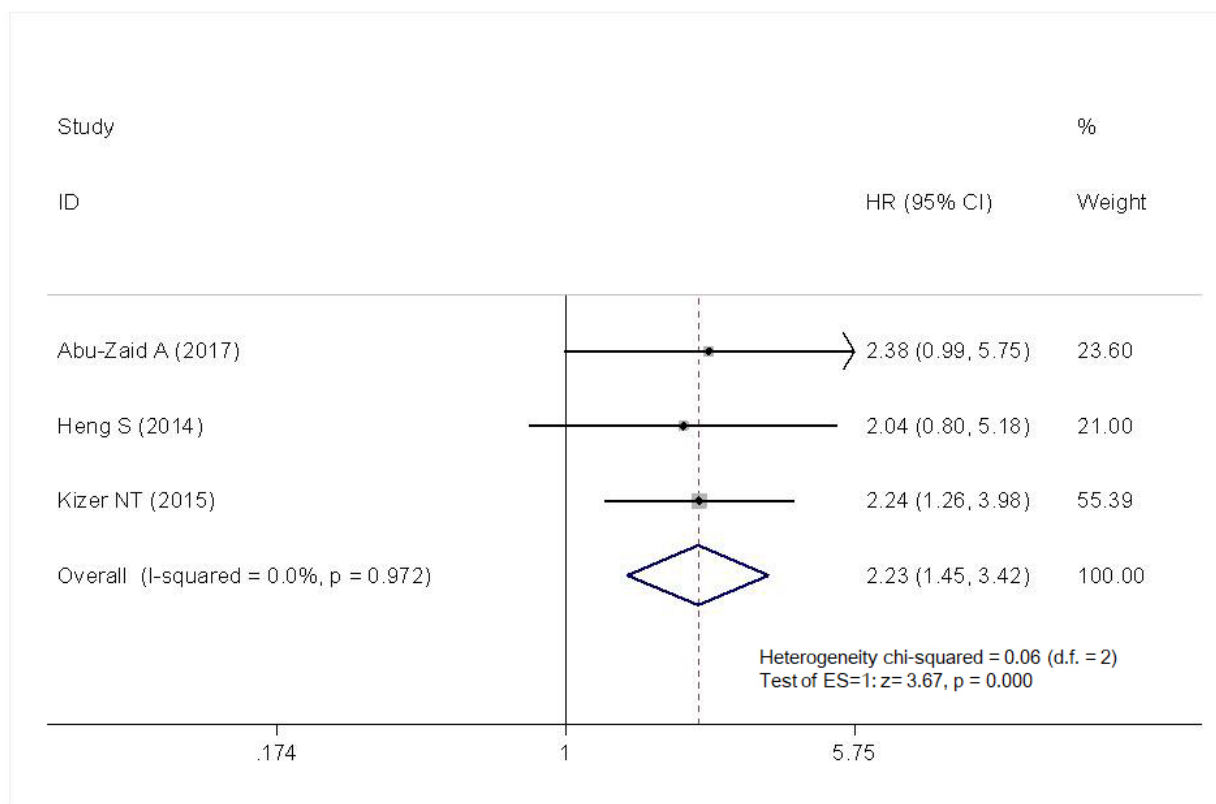

Figure S3. Forest plot of studies evaluating the association between pre-treatment thrombocytosis and disease-specific survival for endometrial cancer. HR, hazard ratio

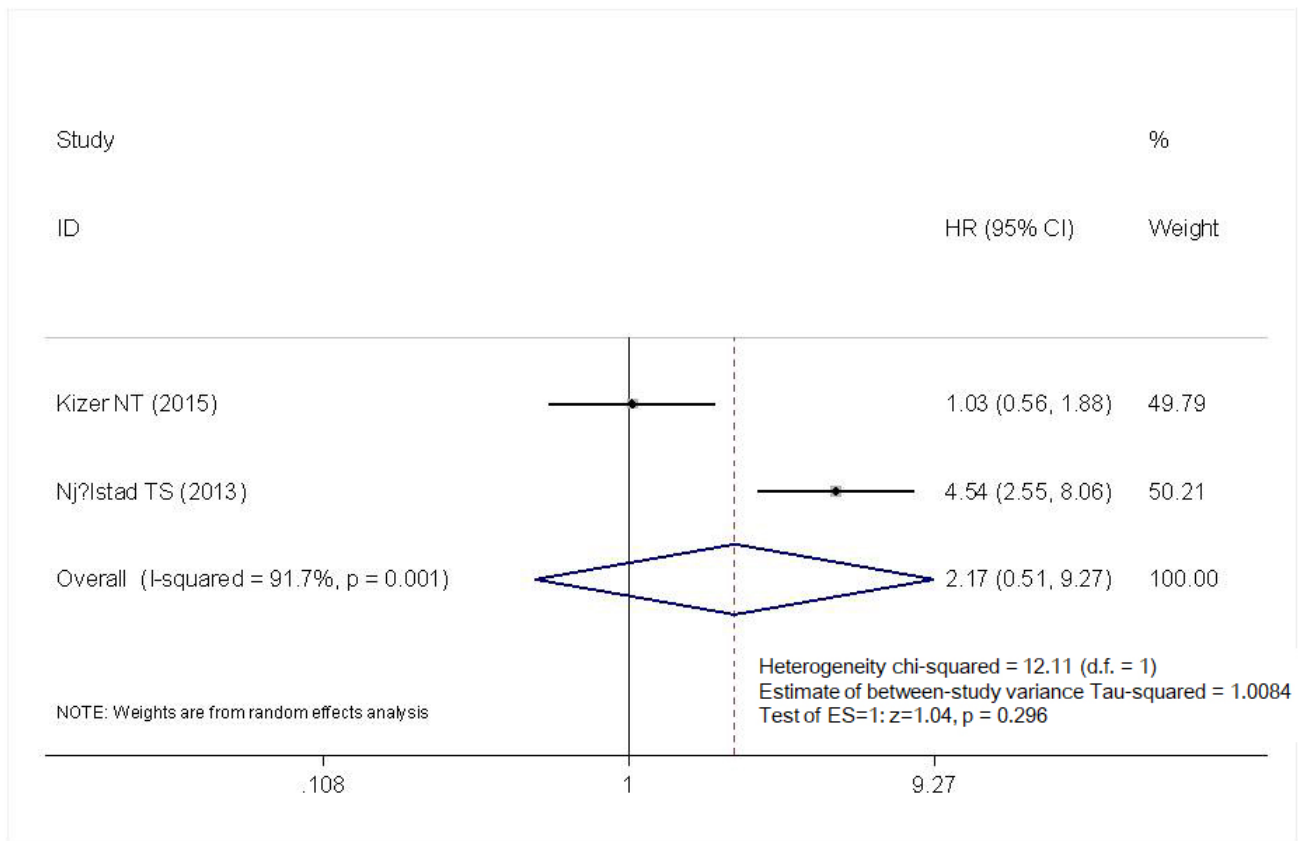

Supplement: Supplementary_Data.pdf [file Supplementary_Data.pdf]
